# Supplementary material for: Why We Should Care About Regional Origins: Educational Selectivity Among Refugees and Labor Migrants in Western Europe
Source: PubMed Central journal article supplement (PMC8022669; doi:10.3389/fsoc.2019.00039), 2019-05-07
Supplement: Presentation_1.pdf [file Presentation_1.pdf]

## Educational selectivity among refugees and labor migrants

Figure S1: Relative and absolute education for all origin groups

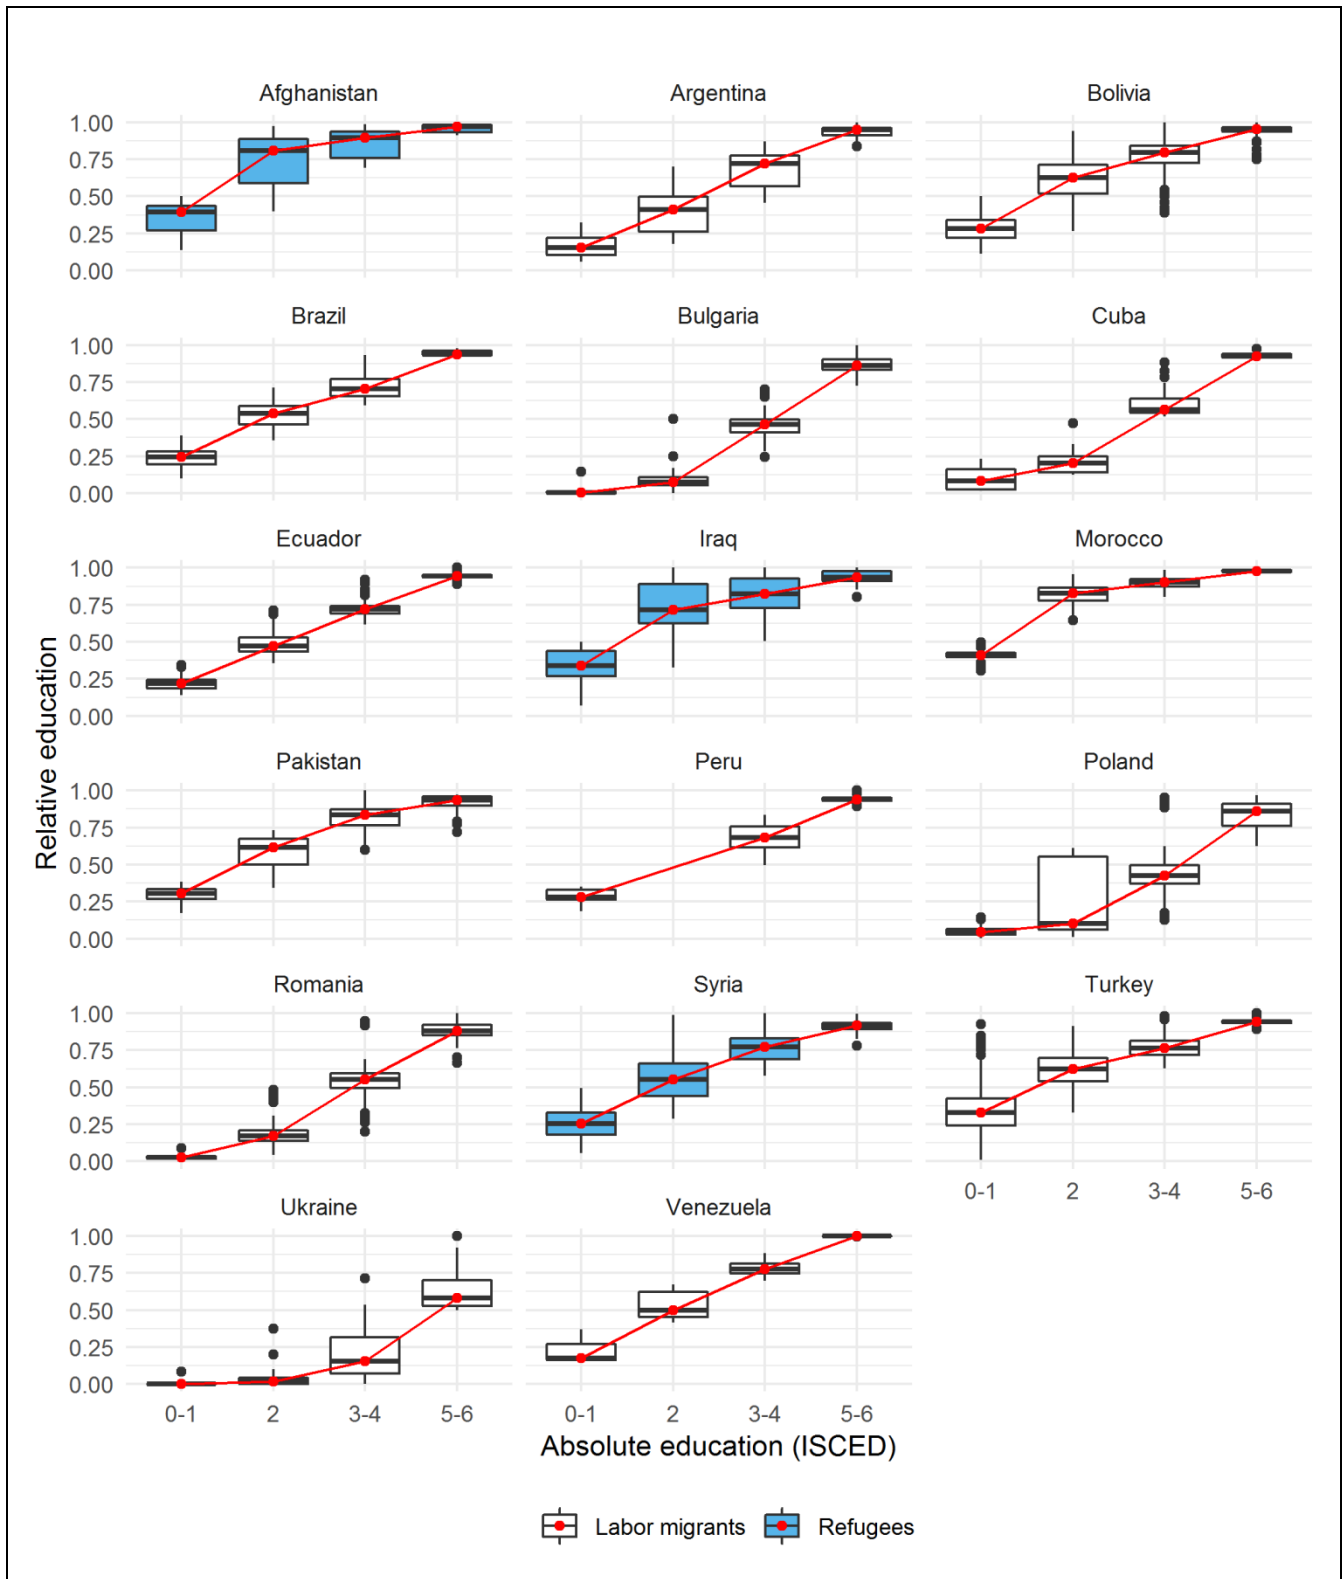

## Educational selectivity among refugees and labor migrants

Figure S2: Alternative illustration of gender differences in educational selectivity

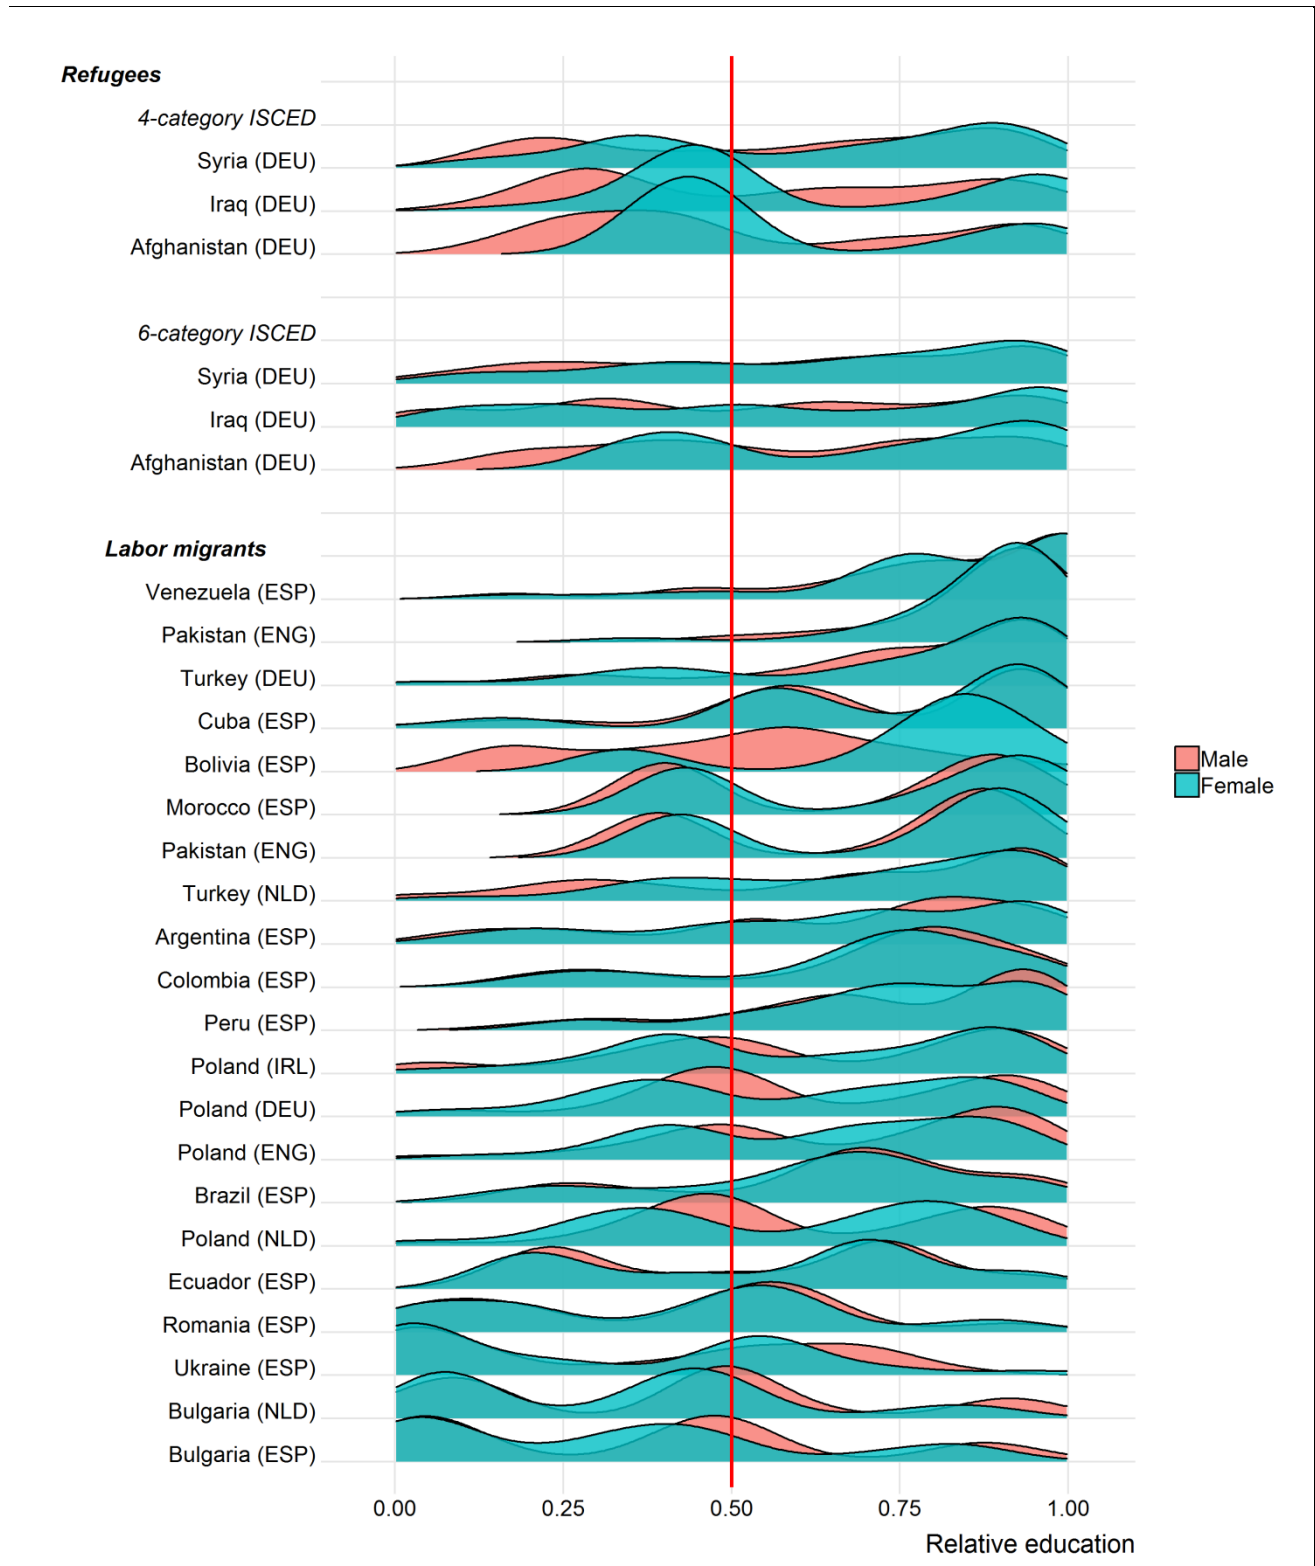

Note: DEU=Germany; ENG=England; ESP=Spain; IRL=Ireland; NLD=Netherlands.
